# Supplementary material
Source: MDPI journal article supplement (https://www.mdpi.com/2073-4344/12/2/126)
Supplement: s1 [file s1]

## Supporting Information

*Article*

# Continuous-Flow Sunlight-Powered CO<sub>2</sub> Methanation Catalyzed by $\gamma$ -Al<sub>2</sub>O<sub>3</sub>-Supported Plasmonic Ru Nanorods

Jelle Rohlfs<sup>1</sup>, Koen W. Bossers<sup>1</sup>, Nicole Meulendijks<sup>1</sup>, Fidel Valega Mackenzie,<sup>1</sup> Man Xu<sup>1,2</sup>, Marcel A. Verheijen<sup>3,4</sup>, Pascal Buskens<sup>1,5,\*</sup>, and Francesc Sastre<sup>1,\*</sup>

<sup>1</sup> The Netherlands Organisation for Applied Scientific Research (TNO), High Tech Campus 25, 5656AE Eindhoven, The Netherlands

<sup>2</sup> Optics Research Group, Delft University of Technology, Lorentzweg 1 (Building 22), 2628CJ Delft, The Netherlands

<sup>3</sup> Eurofins Materials Science, High Tech Campus 11, 5656AE Eindhoven, The Netherlands

<sup>4</sup> Department of Applied Physics, Eindhoven University of Technology, 5600MB Eindhoven, The Netherlands.

<sup>5</sup> Institute for Materials Research. Design and Synthesis of Inorganic Materials (DESINe), Hasselt University, Agoralaan Building D, B-3590 Diepenbeek, Belgium

\* Correspondence: pascal.buskens@tno.nl; francesc.sastre@calabuig@tno.nl

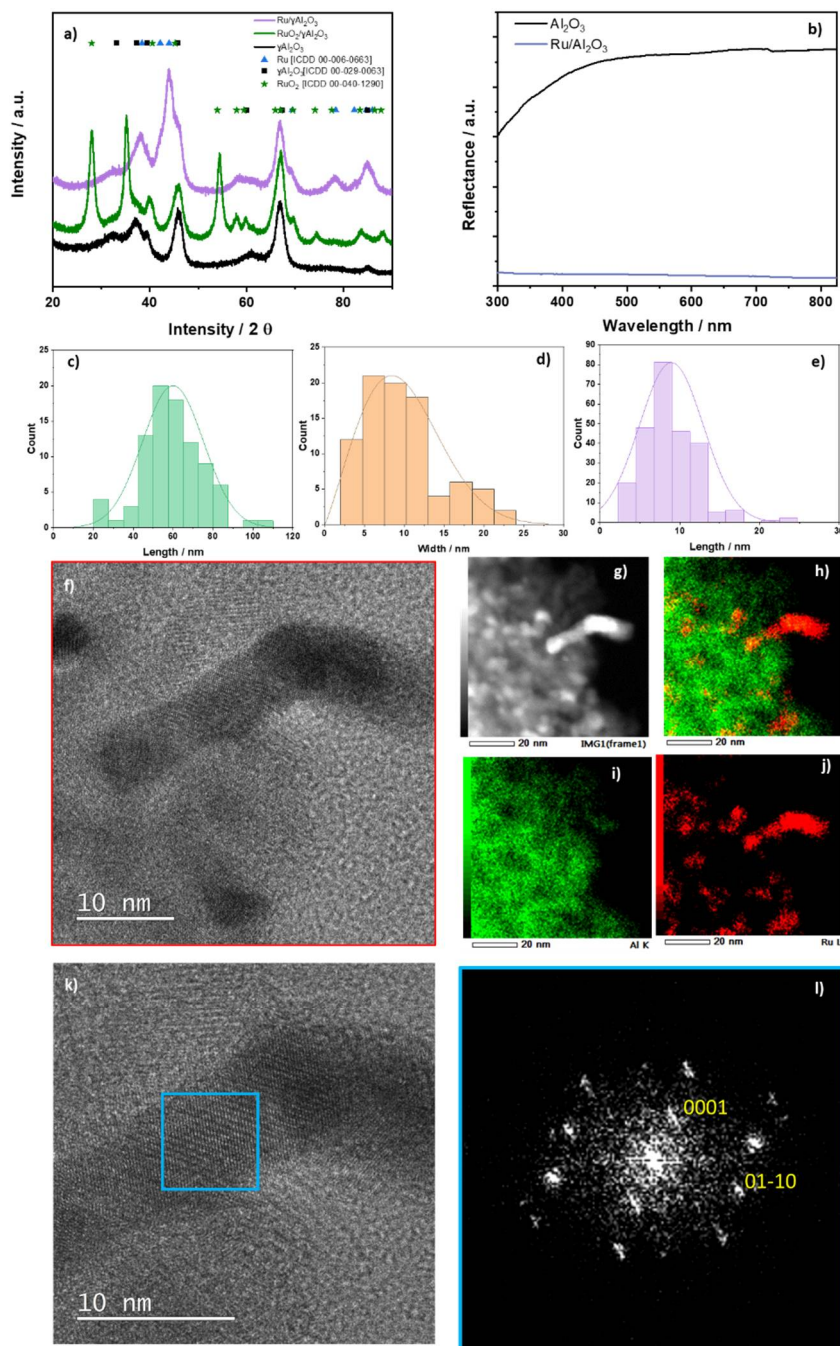

**Figure S1.** Optical and structural characterization of the Ru/ $\gamma$ -Al<sub>2</sub>O<sub>3</sub> catalyst: **a)** XRD pattern of the Ru/ $\gamma$ -Al<sub>2</sub>O<sub>3</sub> (purple line), RuO<sub>2</sub>/ $\gamma$ -Al<sub>2</sub>O<sub>3</sub> (green line) and  $\gamma$ -Al<sub>2</sub>O<sub>3</sub> (black line) containing the characteristic peak positions for the corresponding Ru (blue triangles, ICDD 00-006-0663), RuO<sub>2</sub> (green triangles, ICDD 00-040-1290) and  $\gamma$ -Al<sub>2</sub>O<sub>3</sub> (black squares, ICDD 00-029-0063) **b)** diffuse reflectance UV-vis spectra **c)** the size distribution histogram of the Ru NRs determined an average NR length of 59.8 nm, **d)** the size distribution histogram an average NR width of 9.9 nm, **e)** the size distribution histogram of the Ru spheres determined an average 8.9 nm, **f)** HRTEM image of Ru on  $\gamma$ -Al<sub>2</sub>O<sub>3</sub> **g)** HAADF-STEM image, **h-j)** corresponding EDX elemental maps of Al (green) and Ru (red). **k)** HRTE images of a Ru nanorod. **l)** FFT pattern of the area selected in (k), corresponding to a <2-1-10> zone axis pattern of the hexagonal Ru crystal structure.

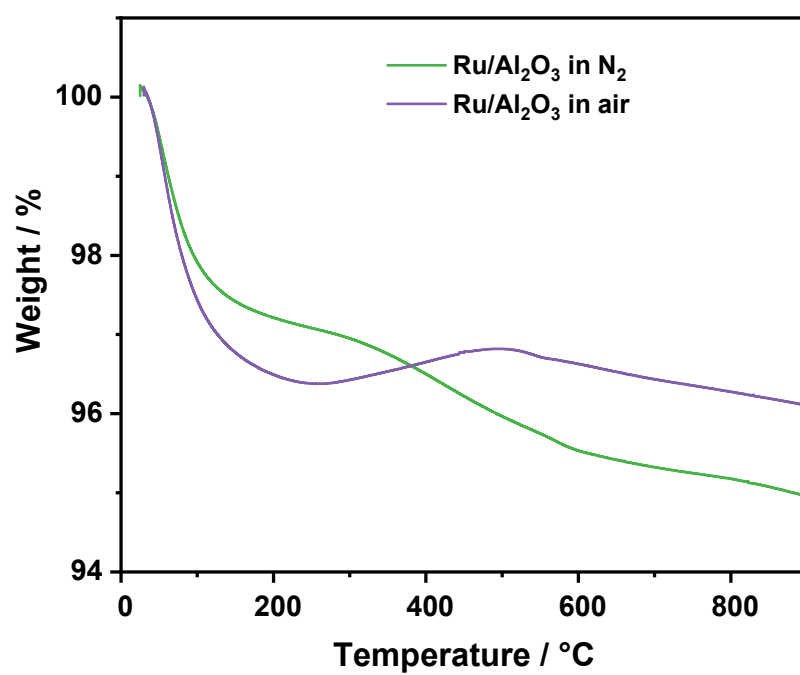

Figure S2. Thermogravimetric analysis for Ru/Al<sub>2</sub>O<sub>3</sub> under N<sub>2</sub> or air atmosphere.

## Equipment for the CO<sub>2</sub> photomethanation reactions

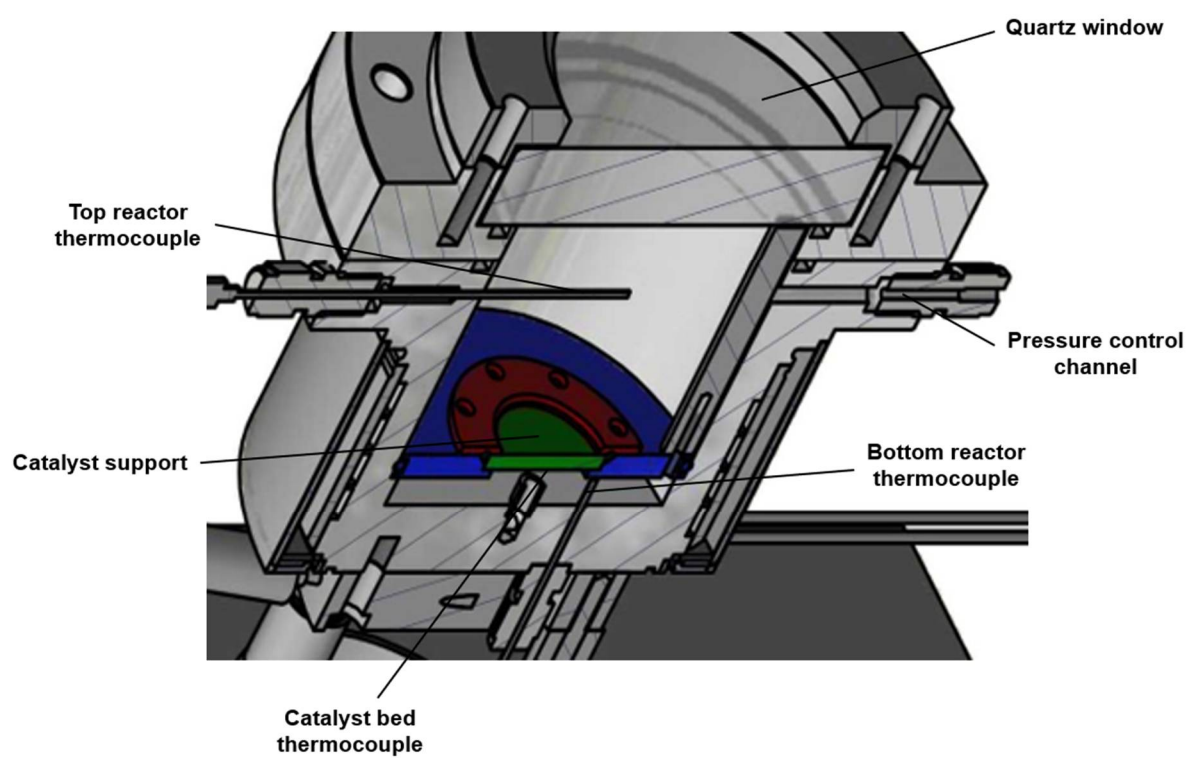

**Figure S3.** Schematic representation of the photoreactor.

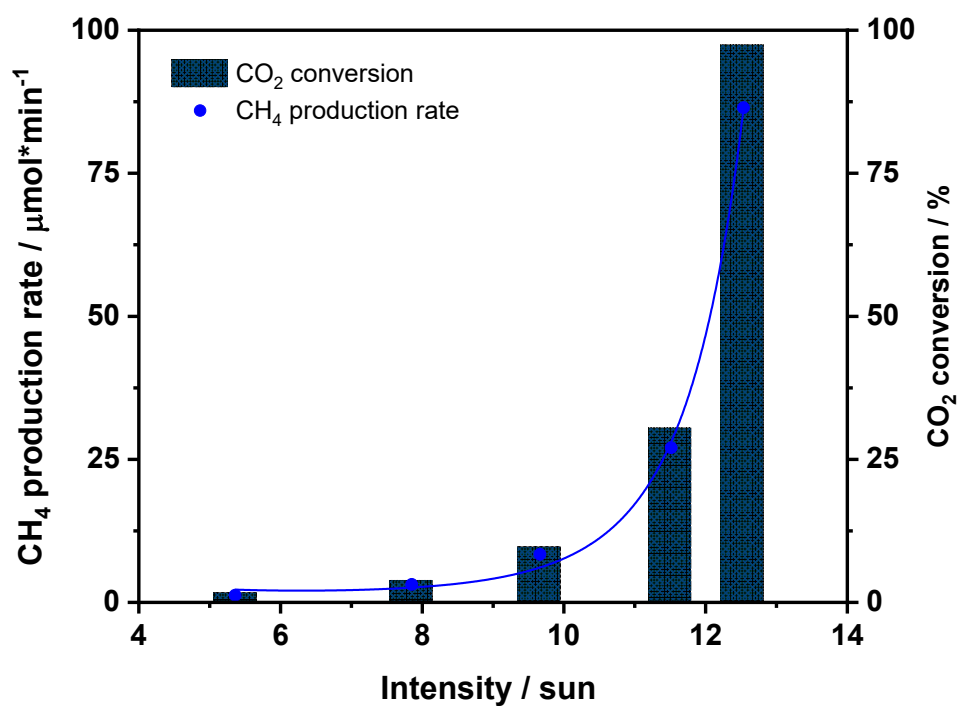

**Figure S4.** CH<sub>4</sub> production rate and CO<sub>2</sub> conversion as function of light intensity for the CO<sub>2</sub> photomethanation without external heating. Reaction conditions: mixture of H<sub>2</sub>:CO<sub>2</sub>:N<sub>2</sub> (4.5:1:1) with a flow of (9:2:2) ml·min<sup>-1</sup> at 1.5 bar pressure (10wt% Ru/γ-Al<sub>2</sub>O<sub>3</sub>, 200 mg total catalyst mass, AM1.5 irradiance (1 sun = 1 kW·m<sup>-2</sup>)).

## Equation for the (apparent) activation energy calculation

Arrhenius equation:

$$R_{CO} = A \cdot e^{\left(\frac{-E_a}{RT}\right)} \quad (\text{eq. S1})$$

A = Pre-exponential factor.

E<sub>a</sub> = Activation Energy.

R = Gas constant (8.314 J·K<sup>-1</sup>·mol<sup>-1</sup>).

T = Reaction temperature.

**Table S1.** Photocatalytic CH<sub>4</sub> production and reaction conditions

| Ref  | Catalyst                                            | Year | Mode  | Lamp         |      | Irradiation     |                                    | Reactor T<br>(°C) | Catalyst<br>T<br>(°C) | Products                                                               |                                              |
|------|-----------------------------------------------------|------|-------|--------------|------|-----------------|------------------------------------|-------------------|-----------------------|------------------------------------------------------------------------|----------------------------------------------|
|      |                                                     |      |       | Power<br>(W) | Type | Filters         | Intensity<br>(mW/cm <sup>2</sup> ) |                   |                       | CH <sub>4</sub>                                                        | CO                                           |
| [1]  | Ru NPs/TiO <sub>2</sub>                             | 1987 | Batch | --           | --   | Solar simulator | 80                                 | RT                | 90                    | 10 μmol·h <sup>-1</sup>                                                | --                                           |
| [2]  | Ni/SiO <sub>2</sub> -Al <sub>2</sub> O <sub>3</sub> | 2014 | Batch | --           | --   | AM 1.5          | --                                 | RT                | 150                   | 54.6 mmol.g <sub>cat</sub> <sup>-1</sup> .h <sup>-1</sup>              | 94.9%CO <sub>2</sub> conv.<br>2.8% Selec.    |
| [3]  | Ru/AlO <sub>3</sub>                                 | 2014 | Batch | 300          | Xe   | --              | --                                 | RT                | 300-400               | 95.75% CO <sub>2</sub> conv.<br>99.22% Selec.                          | 95.75% CO <sub>2</sub> conv.<br>0.78% Selec. |
| [3]  | Rh/Al <sub>2</sub> O <sub>3</sub>                   | 2014 | Batch | 300          | Xe   | --              | --                                 | RT                | 300-400               | 96.25% CO <sub>2</sub> conv.<br>99.48% Selec.                          | 96.25% CO <sub>2</sub> conv.<br>0.52% Selec. |
| [3]  | Ni/Al <sub>2</sub> O <sub>3</sub>                   | 2014 | Batch | 300          | Xe   | --              | --                                 | RT                | 300-400               | 93.25% CO <sub>2</sub> conv.<br>99.04% Selec.                          | 93.25% CO <sub>2</sub> conv.<br>0.25% Selec. |
| [4]  | Rh/Al <sub>2</sub> O <sub>3</sub>                   | 2017 | Batch | --           | LED  | UV              | 3000                               | 350               | --                    | 7 μmol·s <sup>-1</sup> g <sup>-1</sup>                                 | --                                           |
| [5]  | Cu <sub>2</sub> O/Graphene                          | 2017 | Batch | 300          | Xe   | --              | 200                                | 250               | --                    | 14.93 mmol.g <sub>Cu<sub>2</sub>O</sub> <sup>-1</sup> .h <sup>-1</sup> | --                                           |
| [6]  | RuO <sub>2</sub> /i-Si-o                            | 2018 | Batch | 300          | Xe   | --              | 2200                               | RT                | 170                   | 4.4 mmol g <sub>cat</sub> <sup>-1</sup> min <sup>-1</sup>              | --                                           |
| [7]  | Ru/SiO <sub>2</sub>                                 | 2018 | Batch | 300          | Xe   | --              | 2470                               | RT                | 150                   | 2.8 mmol g <sup>-1</sup> min <sup>-1</sup>                             |                                              |
| [8]  | Ru NR/Al <sub>2</sub> O <sub>3</sub>                | 2019 | Batch | 300          | Xe   | AM 1.5          | 1010                               | 25                | 221                   | 52 mmol.g <sub>Ru</sub> <sup>-1</sup> .h <sup>-1</sup>                 | --                                           |
| [9]  | Ru NPs/Al <sub>2</sub> O <sub>3</sub>               | 2020 | Batch | 300          | Xe   | AM 1.5          | 6.2                                | 150               | 220                   | 5.09 mol.g <sub>Ru</sub> <sup>-1</sup> .h <sup>-1</sup>                | --                                           |
| [10] | Ni                                                  | 2021 | Batch | --           | --   | --              | 2000                               | RT                | 100                   | 0.09 mmol <sup>-1</sup> .h <sup>-1</sup>                               |                                              |

|                  |                                                     |      |      |     |    |       |       |     |     |                                                                                                           |    |
|------------------|-----------------------------------------------------|------|------|-----|----|-------|-------|-----|-----|-----------------------------------------------------------------------------------------------------------|----|
| [11]             | Ni/SiO <sub>2</sub> -Al <sub>2</sub> O <sub>3</sub> | 2017 | Flow | 300 | Xe | --    | 232.7 | 225 | --  | 275 $\mu\text{L}\cdot\text{g}_{\text{cat}}^{-1}\cdot\text{min}^{-1}$<br>(3.5% CO <sub>2</sub> conversion) | -- |
| [12]             | <a href="#">Ru@LDHs</a>                             | 2017 | Flow | 300 | Xe | --    | 1000  | RT  | 350 | 277 $\text{mmol}\cdot\text{g}_{\text{cat}}^{-1}\cdot\text{min}^{-1}$                                      | -- |
| This publication | Ru NR/Al <sub>2</sub> O <sub>3</sub>                |      | Flow | 300 | Xe | AM1.5 | 1450  | 25  | 204 | 792 $\text{mmol}\cdot\text{g}_{\text{Ru}}^{-1}\cdot\text{h}^{-1}$                                         |    |

- [1] K. R. Thampi, J. Kiwi, M. Grätzel, *Nature* **1987**, 327, 506-508.
- [2] F. Sastre, A. V. Puga, L. Liu, A. Corma, H. García, *JACS* **2014**, 136, 6798-6801.
- [3] X. Meng, T. Wang, L. Liu, S. Ouyang, P. Li, H. Hu, T. Kako, H. Iwai, A. Tanaka, J. Ye, *Angew Chem* **2014**, 126, 11662-11666.
- [4] X. Zhang, X. Li, D. Zhang, N. Q. Su, W. Yang, H. O. Everitt, J. Liu, *Nat Commun* **2017**, 8, 14542.
- [5] D. Mateo, J. Albero, H. García, *Energy Environ. Sci.* **2017**, 10, 2392-2400.
- [6] A. A. Jelle, K. K. Ghuman, P. G. O'Brien, M. Hmadeh, A. Sandhel, D. D. Perovic, C. V. Singh, C. A. Mims, G. A. Ozin, *Adv Energy Mater* **2018**, 8, 1702277.
- [7] P. G. O'Brien, K. K. Ghuman, A. A. Jelle, A. Sandhel, T. E. Wood, J. Y. Y. Loh, J. Jia, D. Perovic, C. V. Singh, N. P. Kherani, C. A. Mims, G. A. Ozin, *Energy Environ. Sci.* **2018**, 11, 3443-3451.
- [8] F. Sastre, C. Versluis, N. Meulendijks, J. Rodríguez-Fernández, J. Sweelssen, K. Elen, M. K. Van Bael, T. den Hartog, M. A. Verheijen, P. Buskens, *ACS Omega* **2019**, 4, 7369-7377.
- [9] R. Grote, R. Habets, J. Rohlf, F. Sastre, N. Meulendijks, M. Xu, M. Verheijen, K. Elen, A. Hardy, M. van Bael, T. den Hartog, P. Buskens, *ChemCatChem* **2020**, 12, 5618-5622.
- [10] T. M. Steeves, A. P. Esser-Kahn, *RSC Advances* **2021**, 11, 8394-8397.
- [11] J. Albero, E. Dominguez, A. Corma, H. García, *Sustainable Energy & Fuels* **2017**, 1, 1303-1307.
- [12] J. Ren, S. Ouyang, H. Xu, X. Meng, T. Wang, D. Wang, J. Ye, *Adv Energy Mater* **2017**, 7, 1601657.
